# Supplementary material for: Tetranuclear Cu(ii)-chiral complexes: synthesis, characterization and biological activity
Source: Royal Society of Chemistry journal article supplement (doi:10.1039/c9ra03586a), 2019-01-01
Supplement: c9ra03586a1.pdf [file c9ra03586a1.pdf]

## Supporting Information

### Tetranuclear Cu(II)-chiral complexes: Synthesis, characterization and biological activity.

Krisana Peewasan, <sup>[a]\*</sup> Marcel P. Merkel, <sup>[b]</sup> Kristof Zarschler, <sup>[c]</sup> Holger Stephan, <sup>[c]</sup>  
Christopher E. Anson <sup>[a]</sup> and Annie K. Powell <sup>[b]\*</sup>

#### Table of Contents:

|                                                                               |          |
|-------------------------------------------------------------------------------|----------|
| <b>1. Experimental details</b> .....                                          | <b>2</b> |
| - General considerations.....                                                 | 2        |
| - General procedure for synthesis of Chiral Schiff-base ligands.....          | 3        |
| - In vitro experiments.....                                                   | 3        |
| - Cell viability studies.....                                                 | 3        |
| - Antibacterial studies.....                                                  | 3        |
| - Synthesis of <b>(S)</b> -(H <sub>2</sub> mvan)(Pheol-im).....               | 4        |
| - Synthesis of <b>(R)</b> -(H <sub>2</sub> mvan)(Pheol-im) .....              | 4        |
| - Synthesis of Cu(II)-cluster <b>(S)</b> -(mvan)(Pheol-im) <b>(S-1)</b> ..... | 5        |
| - Synthesis of Cu(II)-cluster <b>(R)</b> -(mvan)(Pheol-im) <b>(R-1)</b> ..... | 6        |
| <b>2. Supporting experimental results</b> .....                               | <b>8</b> |
| - Crystallographic data of complexes <b>S-1</b> and <b>R-1</b> .....          | 8        |
| - TableS1.....                                                                | 8        |
| - TableS2.....                                                                | 9        |
| - TableS3.....                                                                | 10       |
| - TableS4.....                                                                | 12       |
| - TableS5.....                                                                | 14       |
| - FigureS1-S8 .....                                                           | 17-23    |

## 1. Experimental details

**General considerations.** All reagents and solvents were used as received from commercial supplies without further purification. Major elemental analyses, such as C, H and N analyses, were carried out with a Vario Micro Cube. The circular dichroism spectra of **S-1** and **R-1** were recorded on a JASCO J-1500 CD-Spektrometer. IR spectra were obtained from Perkin Elmer Spectrum GX FT-IR System in the range of 400-4000  $\text{cm}^{-1}$  in KBr pellets at room temperature. NMR spectra were collected on a Varian Inova operating at 500 MHz. All chemical shifts are reported in parts per million and referenced to tetramethylsilane for  $^1\text{H}$ . Single crystal X-ray diffraction (SCXD) data were collected at 180(2) K using a STOE IPDS II. Powder X-ray diffraction (PXRD) measurements on **R-1** and **S-1** were performed on an STOE STADI-P diffractometer with  $\text{Cu-K}\alpha$  radiation.

### UV/Vis

The maxima absorption of **S-1** and **R-1** were recorded using 50  $\mu\text{M}$  solution in MeOH. In order to compare the optical properties of these complexes to (S)-(H<sub>2</sub>mvan)(Pheol-im) ligand the 400  $\mu\text{M}$  solution of (S)-H<sub>2</sub>L were prepared.

**X-ray structural studies:** X-ray crystallography measurements for *S*-[Cu<sub>4</sub>(mvan)(Pheol-im)<sub>4</sub>(CH<sub>3</sub>OH)<sub>2</sub>](NO<sub>3</sub>)<sub>2</sub> (**S-1**) and *R*-[Cu<sub>4</sub>(mvan)(Pheol-im)<sub>4</sub>(CH<sub>3</sub>OH)<sub>2</sub>](NO<sub>3</sub>)<sub>2</sub> (**R-1**) were determined at 180(2) K STOE IPDS II diffractometer with Mo-K $\alpha$  radiation from a microfocus source, and corrected semi empirically for absorption. Structure solution was by dual-space directed methods (SHELXT-2016), with anisotropic thermal parameters for all ordered non-H atoms. Further details of the crystal structures investigation may be obtained either from FIZ Karlsruhe, 76344 Eggenstein-Leopoldshafen, Germany (FAX: (+49)7247-808-666; email:

crysdata@fiz-karlsruhe.de on quoting the deposition numbers CCDC-1, CCDC-2, CCDC-3,) or CS 1, CS2, CS3.

**Cell Culture:** Cell culture flasks, dishes and plates (CELLSTARS) were supplied by Greiner Bio-One GmbH. The epidermoid human cancer cell line A431 (ATCCS number: CRL-1555) and the human embryonic kidney cell line HEK293 (DMSZ number: ACC 305) were cultured as previously reported <sup>22,23</sup>. All cell lines were confirmed to be mycoplasma-negative using the Venor<sup>®</sup>GeM Advance Mycoplasma Detection Kit (Minerva Biolabs) and were tested monthly.

**In vitro Cytotoxicity Evaluation:** For the cytotoxicity assessment of **S-1** and **R-1**, the MTS (CellTiter 96 Aqueous one Solution Cell Proliferation Assay, Promega) assay was performed as detailed previously <sup>23</sup>. Briefly, 5000 A431 or HEK293 cells, respectively, per well were seeded in sterile 96-well microtiter plates. After 48 h incubation, increasing concentrations of either **S-1** or **R-1** were added to the cells in quintuplicate. After exposure for 48 h, 20  $\mu$ L of MTS assay solution were added to the wells and incubated for 90 min. Optical densities at 492 nm were measured with a microplate reader (Sunrise, Tecan). The viability of the cells is expressed as a percentage of viable cells grown in the absence of the compounds, but in the presence of the corresponding volume of DMSO (vehicle-treated control, final concentration 0.4%). IC50 values were calculated using GraphPad Prism 7.04 (GraphPad Software).

**Antibacterial Testing:** The antibacterial potential of **S-1** and **R-1** against Gram-negative *E. coli* and Gram-positive *B. subtilis* was assessed by monitoring their growth in LB broth over 6 h in the presence of 10, 50 or 100  $\mu$ M of either **S-1**, **R-1** or the corresponding volume of DMSO (vehicle-treated control) as recently described <sup>23</sup>. Briefly, 200  $\mu$ L of an overnight culture of each strain were used to inoculate 20 mL of LB broth and cultivation was continued at 37°C in an orbital shaker with 50 mm offset and shaking speed of 200 rpm (Multitron Cell, Infors).

Cell growth was monitored repeatedly by measurement of optical density in 1 mL cuvettes at 600 nm using a spectrophotometer (Ultrospec 10, Biochrom Ltd).

**Synthesis Chiral Schiff-base ligands.** Synthesis of the Schiff-base ligands *S/R*-(H<sub>2</sub>mvan)(Pheol-im)<sub>4</sub>(CH<sub>3</sub>OH)<sub>2</sub>(NO<sub>3</sub>)<sub>2</sub> was performed by the condensation reaction between 2-hydroxy-3-methoxybenzaldehyde and the corresponding amino alcohol of *R/S*-2-amino-3-phenyl-1-propanol under reflux in absolute ethanol. After completion of the reaction, yellow solid was filtered, washed with cooled ethanol and dried under reduced pressure.

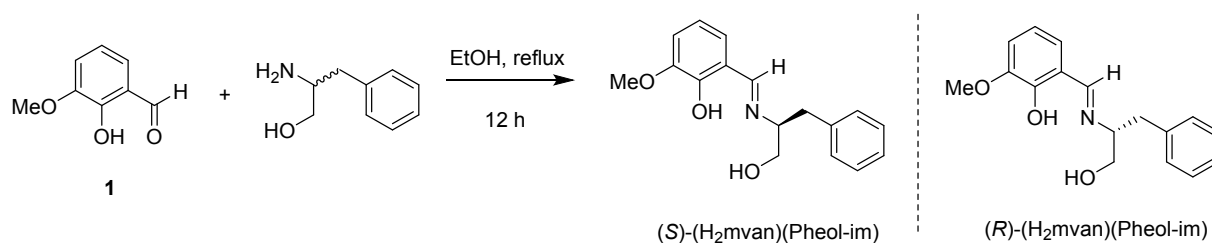

**(βS)-β-[(E)-[(2-Hydroxy-3-methoxyphenyl)methylene]amino]benzenepropanol (S)-**

**(H<sub>2</sub>mvan)(Pheol-im)**: (*S*)-2-amino-3-phenyl-1-propanol (10.91 mmol, 1.650 g) and 2-hydroxy-3-methoxybenzaldehyde (8.71 mmol, 1.326 g) were dissolved in absolute EtOH (100 mL). The resulting mixture was brought to reflux 12 h. After completion of the reaction, the yellow solid was filtered, washed with cooled ethanol and dried under reduced pressure to obtain (86% yield).

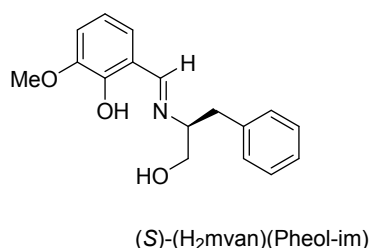

<sup>1</sup>H NMR (500 MHz, DMSO-d<sub>6</sub>) = δ 13.78 (s, 1 H), 7.25 (t, J = 7.5 Hz, 1H), 7.20-7.12 (m, 2H), 6.99 (dd, J = 8.0, 1.5 Hz, 1H), 6.91 (dd, J = 7.8, 1.5 Hz, 1H), 6.74 (t, J = 7.9 Hz, 1H), 4.93 (s, 1H), 3.65

(dd,  $J = 10.4, 3.6$  Hz, 1H), 3.51 (ddt,  $J = 17.6, 9.9, 5.6$  Hz, 1H), 3.00 (dd,  $J = 13.5, 4.4$  Hz, 1H), 2.80 (dd,  $J = 13.5, 8.3$  Hz, 1H).  $^{13}\text{C}$  NMR (126 MHz, DMSO- $d_6$ ) =  $\delta$  165.51 (CH), 151.81 (C), 148.03 (C), 138.54 (C), 129.32 (2 $\times$ CH), 128.21 (2 $\times$ CH), 126.07 (CH), 123.14 (CH), 118.23 (CH), 117.49 (CH), 114.58 (CH), 71.65 (\*CH), 64.20 (CH), 55.72 (CH $_3$ ), 38.33 (CH $_2$ ). FT-IR ( $\text{cm}^{-1}$ ) in KBr: 3436m, 3225m, 3020w, 2920w, 2850w, 1638s, 1503s, 1458m, 1242s, 1088s, 1042m, 972m, 903m, 762s, 707s.

**(BR)- $\beta$ -[(E)-[(2-Hydroxy-3-methoxyphenyl)methylene]amino]benzenepropanol**

**(R)-(H $_2$ mvan)(Pheol-im):** (*R*)-2-amino-3-phenyl-1-propanol (8.5 mmol, 0.8872 g) and 2-hydroxy-3-methoxybenzaldehyde (6.36 mmol, 0.9682 g) were dissolved in absolute EtOH (100 mL). The resulting mixture was brought to reflux 12 h. After completion of reaction, the yellow solid was filtered, washed with cooled ethanol and dried under reduced pressure to obtain (82% yield).

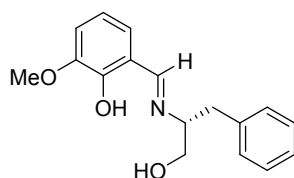

(*R*)-(H $_2$ mvan)(Pheol-im)

$^1\text{H}$  NMR (500 MHz, DMSO- $d_6$ ) =  $\delta$  13.75 (s, 1H), 8.24 (s, 1H), 7.27-7.20 (m, 2H), 7.20-7.11 (m, 3H), 6.98 (dd,  $J = 8.0, 1.5$  Hz, 1H), 6.90 (dd,  $J = 7.8, 1.5$  Hz, 1H), 6.73 (t,  $J = 7.8$  Hz, 1H), 4.98-4.83 (m, 1H), 3.76 (s, 3H), 3.68-3.57 (m, 1H), 3.57-3.41 (m, 2H), 2.99 (dd,  $J = 13.5, 4.4$  Hz, 1H), 2.78 (dd,  $J = 13.5, 8.4$  Hz, 1H).  $^{13}\text{C}$  NMR (126 MHz, DMSO- $d_6$ ) =  $\delta$  165.33 (CH), 151.61 (C), 147.84 (C), 138.37 (C), 129.14 (2 $\times$ CH), 128.03 (2 $\times$ CH), 125.89 (CH), 122.96 (CH), 118.05 (CH), 117.31 (CH), 114.41 (CH), 71.46 (\*CH), 64.01 (CH), 55.55 (CH $_3$ ), 38.13 (CH $_2$ ). FT-IR ( $\text{cm}^{-1}$ ) in KBr:

3436m, 3210m, 3015w, 2925w, 2855w, 1643s, 1498s, 1458s, 1242s, 1218s, 1157w, 1088s, 957w, 901m, 756m, 707m.

**Synthesis of Cu(II)-cluster  $C_{70}H_{78}Cu_4N_6O_{20}$  (S-1); (S)-[Cu<sub>4</sub>(mvan)(Pheol-im)<sub>4</sub>(CH<sub>3</sub>OH)<sub>2</sub>](NO<sub>3</sub>)<sub>2</sub>:**

A solution of the Schiff-base ligand S-(H<sub>2</sub>mvan)(Pheol-im) (0.2 mmol, 57 mg) in methanol (10 mL) was added a solution of Cu(NO<sub>3</sub>)<sub>2</sub>·5H<sub>2</sub>O (0.1 mmol, 24 mg) in methanol (5 mL). The resulting mixture was stirred at room temperature for 15 min then a solution of NaOAc·3H<sub>2</sub>O (0.5 mmol, 68 mg) in methanol (5 mL) was added and the reaction mixture was allowed to stir for another 30 min. After being filtered the green solution was left to stand at ambient temperature to allow for solvent evaporation. After 7 days, green crystals of the complex S-[Cu<sub>4</sub>L<sub>4</sub>(CH<sub>3</sub>OH)<sub>2</sub>](NO<sub>3</sub>)<sub>2</sub> were obtained. The crystals were isolated by filtration and air-dried. Yield: 72% (based on Cu(NO<sub>3</sub>)<sub>2</sub>·5H<sub>2</sub>O). Elemental analysis calcd for S-1 (C<sub>70</sub>H<sub>78</sub>N<sub>6</sub>O<sub>20</sub>Cu<sub>4</sub>): C, 53.29%; H, 4.98%; N, 5.33%. Found: C, 52.51%; H, 4.52%; N, 5.34%. FT-IR (cm<sup>-1</sup>) in KBr: 3360m, 2927m, 1619s, 1446s, 1297s, 1221s, 1089s, 1035s, 978s, 854m, 737s, 703s, 639m.

**Synthesis of Cu(II)-cluster  $C_{70}H_{78}Cu_4N_6O_{20}$  (R-1); (R)-[Cu<sub>4</sub>(mvan)(Pheol-im)<sub>4</sub>(CH<sub>3</sub>OH)<sub>2</sub>](NO<sub>3</sub>)<sub>2</sub>:**

A solution of the Schiff-base ligand R-(H<sub>2</sub>mvan)(Pheol-im) (0.2 mmol, 57 mg) in methanol (10 mL) was added a solution of Cu(NO<sub>3</sub>)<sub>2</sub>·5H<sub>2</sub>O (0.1 mmol, 24 mg) in methanol (5 mL). The resulting mixture was stirred at room temperature for 15 min then a solution of NaOAc·3H<sub>2</sub>O (0.5 mmol, 68 mg) in methanol (5 mL) was added and the reaction mixture was allowed to stir for further 30 min. After being filtered the green solution was left to stand at ambient temperature to allow for solvent evaporation. After 7 days, green crystals of the complex R-[Cu<sub>4</sub>L<sub>4</sub>(CH<sub>3</sub>OH)<sub>2</sub>](NO<sub>3</sub>)<sub>2</sub> were obtained. R-H<sub>2</sub>L. Yield 70% (based on Cu(NO<sub>3</sub>)<sub>2</sub>·5H<sub>2</sub>O). Elemental analysis calcd for R-1 (C<sub>70</sub>H<sub>78</sub>N<sub>6</sub>O<sub>20</sub>Cu<sub>4</sub>): C, 53.29%; H, 4.98%; N,

5.33%. Found: C, 52.07%; H, 4.78%; N, 5.31%. FT-IR (cm<sup>-1</sup>) KBr: 3367m, 2935m, 1630s, 1549m, 1439s, 1299s, 1219s, 1084s, 1039s, 979s, 858m, 743s, 698s, 633m.

## 2.Supporting experimental results

### Crystallographic data

Table S1. Crystallographic data of complexes S-1 and R-1

|                                              | S-1                                                                            | R-1                                                                                |
|----------------------------------------------|--------------------------------------------------------------------------------|------------------------------------------------------------------------------------|
| Empirical formula                            | C <sub>71</sub> H <sub>82</sub> Cu <sub>4</sub> N <sub>6</sub> O <sub>21</sub> | C <sub>70.7</sub> H <sub>80.8</sub> Cu <sub>4</sub> N <sub>6</sub> O <sub>21</sub> |
| Formula weight                               | 1609.58                                                                        | 1604.77                                                                            |
| Temperature/K                                | 180(2)                                                                         | 180.15                                                                             |
| Crystal system                               | monoclinic                                                                     | monoclinic                                                                         |
| Space group                                  | P2 <sub>1</sub>                                                                | P2 <sub>1</sub>                                                                    |
| A [Å]                                        | 10.6198(7)                                                                     | 10.5835(8)                                                                         |
| B [Å]                                        | 21.4213(14)                                                                    | 21.529(2)                                                                          |
| C [Å]                                        | 15.6347(12)                                                                    | 15.5711(12)                                                                        |
| α [°]                                        | 90                                                                             | 90                                                                                 |
| β [°]                                        | 94.833(6)                                                                      | 94.696(6)                                                                          |
| γ [°]                                        | 90                                                                             | 90                                                                                 |
| Volume [Å <sup>3</sup> ]                     | 3544.1(4)                                                                      | 3536.0(5)                                                                          |
| Z                                            | 2                                                                              | 2                                                                                  |
| ρ <sub>calc</sub> [cm <sup>-3</sup> ]        | 1.508                                                                          | 1.507                                                                              |
| μ [mm <sup>-1</sup> ]                        | 1.263                                                                          | 1.266                                                                              |
| F(000)                                       | 1668                                                                           | 1662                                                                               |
| Crystal size [mm <sup>3</sup> ]              | 0.34 × 0.18 × 0.16                                                             | 0.58 × 0.23 × 0.18                                                                 |
| Radiation                                    | MoKα (λ = 0.71069)                                                             | MoKα (λ = 0.71073)                                                                 |
| 2θ range for data collection [°]             | 3.232 to 53.462                                                                | 3.784 to 52.742                                                                    |
| Index ranges                                 | -13 ≤ h ≤ 13, -24 ≤ k ≤ 27, -16 ≤ l ≤ 19                                       | -11 ≤ h ≤ 13, -26 ≤ k ≤ 26, -19 ≤ l ≤ 19                                           |
| Reflections collected                        | 29165                                                                          | 28025                                                                              |
| Independent reflections                      | 14517 [R <sub>int</sub> = 0.0493, R <sub>sigma</sub> = 0.0652]                 | 14367 [R <sub>int</sub> = 0.0873, R <sub>sigma</sub> = 0.0750]                     |
| Data/restraints/parameters                   | 14517/29/940                                                                   | 14367/34/935                                                                       |
| Goodness-of-fit on F <sup>2</sup>            | 0.938                                                                          | 0.978                                                                              |
| Final R indexes [I >= 2σ (I)]                | R <sub>1</sub> = 0.0380, wR <sub>2</sub> = 0.0829                              | R <sub>1</sub> = 0.0431, wR <sub>2</sub> = 0.1067                                  |
| Final R indexes [all data]                   | R <sub>1</sub> = 0.0648, wR <sub>2</sub> = 0.0936                              | R <sub>1</sub> = 0.0624, wR <sub>2</sub> = 0.1200                                  |
| Largest diff. peak/hole [e Å <sup>-3</sup> ] | 0.53/-0.62                                                                     | 0.73/-0.63                                                                         |
| Flack parameter                              | -0.010(7)                                                                      | 0.0+G1:12903(15)                                                                   |

Table S2. Crystallographic data of complexes S-1: bond lengths

| Atom | Atom | Length/Å  | Atom | Atom | Length/Å  |
|------|------|-----------|------|------|-----------|
| Cu1  | O2   | 1.934(4)  | C11  | C12  | 1.512(8)  |
| Cu1  | O3   | 1.996(4)  | C12  | C13  | 1.374(9)  |
| Cu1  | O6   | 1.929(4)  | C12  | C17  | 1.388(9)  |
| Cu1  | O13  | 2.324(5)  | C13  | C14  | 1.381(9)  |
| Cu1  | N1   | 1.941(5)  | C14  | C15  | 1.367(11) |
| Cu2  | O5   | 1.904(4)  | C15  | C16  | 1.365(12) |
| Cu2  | O6   | 1.976(4)  | C16  | C17  | 1.393(10) |
| Cu2  | O7   | 2.380(4)  | C18  | C19  | 1.418(8)  |
| Cu2  | O8   | 2.002(4)  | C18  | C23  | 1.399(10) |
| Cu2  | O12  | 2.504(4)  | C19  | C20  | 1.362(9)  |
| Cu2  | N2   | 1.930(5)  | C20  | C21  | 1.389(12) |
| Cu3  | O8   | 1.936(4)  | C21  | C22  | 1.365(10) |
| Cu3  | O9   | 1.971(5)  | C22  | C23  | 1.405(9)  |
| Cu3  | O12  | 1.951(4)  | C23  | C24  | 1.443(9)  |
| Cu3  | O14  | 2.305(4)  | C26  | C27  | 1.507(9)  |
| Cu3  | N3   | 1.948(5)  | C26  | C28  | 1.525(9)  |
| Cu4  | O1   | 2.423(4)  | C28  | C29  | 1.501(9)  |
| Cu4  | O2   | 1.985(4)  | C29  | C30  | 1.397(10) |
| Cu4  | O6   | 2.444(4)  | C29  | C34  | 1.369(10) |
| Cu4  | O11  | 1.926(4)  | C30  | C31  | 1.378(9)  |
| Cu4  | O12  | 1.991(4)  | C31  | C32  | 1.355(10) |
| Cu4  | N4   | 1.931(5)  | C32  | C33  | 1.382(10) |
| O1   | C2   | 1.351(8)  | C33  | C34  | 1.388(9)  |
| O1   | C8   | 1.444(8)  | C35  | C36  | 1.422(9)  |
| O2   | C1   | 1.325(7)  | C35  | C40  | 1.391(8)  |
| O3   | C10  | 1.429(8)  | C36  | C37  | 1.374(9)  |
| O4   | C19  | 1.375(8)  | C37  | C38  | 1.373(10) |
| O4   | C25  | 1.424(8)  | C38  | C39  | 1.379(10) |
| O5   | C18  | 1.314(7)  | C39  | C40  | 1.400(9)  |
| O6   | C27  | 1.431(8)  | C40  | C41  | 1.450(9)  |
| O7   | C36  | 1.350(8)  | C43  | C44  | 1.524(10) |
| O7   | C42  | 1.434(8)  | C43  | C45  | 1.531(9)  |
| O8   | C35  | 1.324(7)  | C45  | C46  | 1.516(10) |
| O9   | C44  | 1.438(9)  | C46  | C47  | 1.387(10) |
| O10  | C53  | 1.353(9)  | C46  | C51  | 1.374(11) |
| O10  | C59  | 1.427(9)  | C47  | C48  | 1.383(11) |
| O11  | C52  | 1.321(8)  | C48  | C49  | 1.356(13) |
| O12  | C61  | 1.407(7)  | C49  | C50  | 1.366(14) |
| O13  | C69  | 1.420(10) | C50  | C51  | 1.387(12) |
| O14  | C70  | 1.415(8)  | C52  | C53  | 1.434(9)  |
| O18  | N6   | 1.242(10) | C52  | C57  | 1.394(9)  |
| O19  | N6   | 1.209(11) | C53  | C54  | 1.374(10) |



|     |     |           |      |      |           |
|-----|-----|-----------|------|------|-----------|
| O20 | N6  | 1.202(9)  | C54  | C55  | 1.389(12) |
| N1  | C7  | 1.299(8)  | C55  | C56  | 1.363(10) |
| N1  | C9  | 1.454(8)  | C56  | C57  | 1.410(9)  |
| N2  | C24 | 1.282(7)  | C57  | C58  | 1.439(9)  |
| N2  | C26 | 1.481(8)  | C60  | C61  | 1.512(9)  |
| N3  | C41 | 1.277(8)  | C60  | C62  | 1.518(9)  |
| N3  | C43 | 1.482(8)  | C62  | C63  | 1.499(8)  |
| N4  | C58 | 1.287(8)  | C63  | C64  | 1.379(10) |
| N4  | C60 | 1.483(8)  | C63  | C68  | 1.395(10) |
| C1  | C2  | 1.407(9)  | C64  | C65  | 1.377(10) |
| C1  | C6  | 1.402(9)  | C65  | C66  | 1.352(11) |
| C2  | C3  | 1.391(10) | C66  | C67  | 1.379(12) |
| C3  | C4  | 1.374(10) | C67  | C68  | 1.385(10) |
| C4  | C5  | 1.357(10) | O71A | C71A | 1.49(2)   |
| C5  | C6  | 1.421(9)  | O15  | N5   | 1.271(8)  |
| C6  | C7  | 1.437(9)  | O16  | N5   | 1.237(9)  |
| C9  | C10 | 1.524(8)  | O17  | N5   | 1.216(10) |
| C9  | C11 | 1.535(8)  | C71B | O71B | 1.44(3)   |

**Table S3. Crystallographic data of complexes S-1: bond angles**

| Atom | Atom | Atom | Angle/°    | Atom | Atom | Atom | Angle/°  |
|------|------|------|------------|------|------|------|----------|
| O2   | Cu1  | O3   | 173.84(19) | C3   | C2   | C1   | 120.5(6) |
| O2   | Cu1  | O13  | 88.29(18)  | C4   | C3   | C2   | 119.9(7) |
| O2   | Cu1  | N1   | 91.98(19)  | C5   | C4   | C3   | 121.8(6) |
| O3   | Cu1  | O13  | 95.05(18)  | C4   | C5   | C6   | 119.5(6) |
| O6   | Cu1  | O2   | 86.59(17)  | C1   | C6   | C5   | 119.9(6) |
| O6   | Cu1  | O3   | 98.28(17)  | C1   | C6   | C7   | 123.1(5) |
| O6   | Cu1  | O13  | 94.58(17)  | C5   | C6   | C7   | 116.7(6) |
| O6   | Cu1  | N1   | 164.20(18) | N1   | C7   | C6   | 126.1(6) |
| N1   | Cu1  | O3   | 82.31(19)  | N1   | C9   | C10  | 107.0(5) |
| N1   | Cu1  | O13  | 101.11(18) | N1   | C9   | C11  | 109.8(5) |
| O5   | Cu2  | O6   | 174.67(19) | C10  | C9   | C11  | 111.8(5) |
| O5   | Cu2  | O7   | 95.25(17)  | O3   | C10  | C9   | 108.8(5) |
| O5   | Cu2  | O8   | 91.03(18)  | C12  | C11  | C9   | 112.0(5) |
| O5   | Cu2  | O12  | 92.64(16)  | C13  | C12  | C11  | 120.8(6) |
| O5   | Cu2  | N2   | 93.39(19)  | C13  | C12  | C17  | 118.7(6) |
| O6   | Cu2  | O7   | 90.08(16)  | C17  | C12  | C11  | 120.5(6) |
| O6   | Cu2  | O8   | 90.67(16)  | C12  | C13  | C14  | 121.2(6) |
| O6   | Cu2  | O12  | 83.08(15)  | C15  | C14  | C13  | 119.7(7) |
| O7   | Cu2  | O12  | 144.01(14) | C16  | C15  | C14  | 120.3(7) |
| O8   | Cu2  | O7   | 72.90(16)  | C15  | C16  | C17  | 120.2(7) |
| O8   | Cu2  | O12  | 71.91(15)  | C12  | C17  | C16  | 119.9(7) |
| N2   | Cu2  | O6   | 85.52(19)  | O5   | C18  | C19  | 118.1(6) |
| N2   | Cu2  | O7   | 100.08(19) | O5   | C18  | C23  | 124.3(5) |

|     |     |     |            |     |     |     |          |
|-----|-----|-----|------------|-----|-----|-----|----------|
| N2  | Cu2 | O8  | 172.0(2)   | C23 | C18 | C19 | 117.6(5) |
| N2  | Cu2 | O12 | 114.44(18) | O4  | C19 | C18 | 113.3(5) |
| O8  | Cu3 | O9  | 171.39(19) | C20 | C19 | O4  | 124.9(6) |
| O8  | Cu3 | O12 | 87.04(18)  | C20 | C19 | C18 | 121.8(7) |
| O8  | Cu3 | O14 | 93.58(16)  | C19 | C20 | C21 | 119.7(6) |
| O8  | Cu3 | N3  | 91.1(2)    | C22 | C21 | C20 | 120.5(7) |
| O9  | Cu3 | O14 | 92.79(18)  | C21 | C22 | C23 | 120.6(7) |
| O12 | Cu3 | O9  | 98.3(2)    | C18 | C23 | C22 | 119.9(6) |
| O12 | Cu3 | O14 | 94.22(16)  | C18 | C23 | C24 | 123.2(5) |
| N3  | Cu3 | O9  | 82.5(2)    | C22 | C23 | C24 | 116.9(6) |
| N3  | Cu3 | O12 | 169.30(19) | N2  | C24 | C23 | 125.3(6) |
| N3  | Cu3 | O14 | 96.41(19)  | N2  | C26 | C27 | 106.0(5) |
| O1  | Cu4 | O6  | 143.56(15) | N2  | C26 | C28 | 116.4(5) |
| O2  | Cu4 | O1  | 71.31(16)  | C27 | C26 | C28 | 112.8(6) |
| O2  | Cu4 | O6  | 72.64(15)  | O6  | C27 | C26 | 110.1(5) |
| O2  | Cu4 | O12 | 90.87(17)  | C29 | C28 | C26 | 109.9(5) |
| O11 | Cu4 | O1  | 94.33(18)  | C30 | C29 | C28 | 119.5(6) |
| O11 | Cu4 | O2  | 91.68(18)  | C34 | C29 | C28 | 122.1(7) |
| O11 | Cu4 | O6  | 91.86(17)  | C34 | C29 | C30 | 118.2(6) |
| O11 | Cu4 | O12 | 174.62(19) | C31 | C30 | C29 | 120.6(7) |
| O11 | Cu4 | N4  | 93.0(2)    | C32 | C31 | C30 | 120.3(7) |
| O12 | Cu4 | O1  | 90.97(17)  | C31 | C32 | C33 | 120.3(6) |
| O12 | Cu4 | O6  | 84.39(15)  | C32 | C33 | C34 | 119.3(7) |
| N4  | Cu4 | O1  | 102.85(19) | C29 | C34 | C33 | 121.2(7) |
| N4  | Cu4 | O2  | 172.8(2)   | O8  | C35 | C36 | 118.6(5) |
| N4  | Cu4 | O6  | 112.65(19) | O8  | C35 | C40 | 123.1(6) |
| N4  | Cu4 | O12 | 84.94(19)  | C40 | C35 | C36 | 118.4(6) |
| C2  | O1  | Cu4 | 109.7(4)   | O7  | C36 | C35 | 114.6(5) |
| C2  | O1  | C8  | 119.6(5)   | O7  | C36 | C37 | 124.9(6) |
| C8  | O1  | Cu4 | 129.6(4)   | C37 | C36 | C35 | 120.5(6) |
| Cu1 | O2  | Cu4 | 106.90(19) | C38 | C37 | C36 | 120.5(7) |
| C1  | O2  | Cu1 | 128.6(4)   | C37 | C38 | C39 | 120.2(6) |
| C1  | O2  | Cu4 | 124.3(4)   | C38 | C39 | C40 | 120.5(6) |
| C10 | O3  | Cu1 | 113.3(4)   | C35 | C40 | C39 | 119.9(6) |
| C19 | O4  | C25 | 117.3(5)   | C35 | C40 | C41 | 123.2(6) |
| C18 | O5  | Cu2 | 126.8(4)   | C39 | C40 | C41 | 116.8(6) |
| Cu1 | O6  | Cu2 | 123.7(2)   | N3  | C41 | C40 | 125.4(6) |
| Cu1 | O6  | Cu4 | 91.32(15)  | N3  | C43 | C44 | 106.1(6) |
| Cu2 | O6  | Cu4 | 94.63(17)  | N3  | C43 | C45 | 109.7(5) |
| C27 | O6  | Cu1 | 118.9(4)   | C44 | C43 | C45 | 111.0(6) |
| C27 | O6  | Cu2 | 106.7(3)   | O9  | C44 | C43 | 108.7(5) |
| C27 | O6  | Cu4 | 118.5(4)   | C46 | C45 | C43 | 112.9(6) |
| C36 | O7  | Cu2 | 110.8(4)   | C47 | C46 | C45 | 119.8(7) |
| C36 | O7  | C42 | 118.6(5)   | C51 | C46 | C45 | 121.1(7) |
| C42 | O7  | Cu2 | 130.7(5)   | C51 | C46 | C47 | 119.1(7) |

|     |     |     |            |     |     |     |          |
|-----|-----|-----|------------|-----|-----|-----|----------|
| Cu3 | O8  | Cu2 | 107.04(19) | C48 | C47 | C46 | 120.1(8) |
| C35 | O8  | Cu2 | 122.9(4)   | C49 | C48 | C47 | 120.2(9) |
| C35 | O8  | Cu3 | 129.0(4)   | C48 | C49 | C50 | 120.4(9) |
| C44 | O9  | Cu3 | 113.8(4)   | C49 | C50 | C51 | 120.1(9) |
| C53 | O10 | C59 | 116.7(6)   | C46 | C51 | C50 | 120.1(8) |
| C52 | O11 | Cu4 | 125.3(4)   | O11 | C52 | C53 | 117.2(6) |
| Cu3 | O12 | Cu2 | 89.70(15)  | O11 | C52 | C57 | 125.2(5) |
| Cu3 | O12 | Cu4 | 127.1(2)   | C57 | C52 | C53 | 117.6(6) |
| Cu4 | O12 | Cu2 | 92.43(16)  | O10 | C53 | C52 | 114.5(6) |
| C61 | O12 | Cu2 | 116.9(4)   | O10 | C53 | C54 | 125.2(6) |
| C61 | O12 | Cu3 | 118.8(4)   | C54 | C53 | C52 | 120.3(7) |
| C61 | O12 | Cu4 | 107.0(4)   | C53 | C54 | C55 | 121.4(7) |
| C69 | O13 | Cu1 | 135.6(5)   | C56 | C55 | C54 | 119.0(7) |
| C70 | O14 | Cu3 | 134.3(4)   | C55 | C56 | C57 | 121.6(7) |
| C7  | N1  | Cu1 | 126.1(4)   | C52 | C57 | C56 | 120.1(6) |
| C7  | N1  | C9  | 119.7(5)   | C52 | C57 | C58 | 123.3(6) |
| C9  | N1  | Cu1 | 114.2(4)   | C56 | C57 | C58 | 116.6(6) |
| C24 | N2  | Cu2 | 125.7(5)   | N4  | C58 | C57 | 124.9(6) |
| C24 | N2  | C26 | 122.3(5)   | N4  | C60 | C61 | 105.3(5) |
| C26 | N2  | Cu2 | 112.0(4)   | N4  | C60 | C62 | 115.8(5) |
| C41 | N3  | Cu3 | 127.5(4)   | C61 | C60 | C62 | 112.8(6) |
| C41 | N3  | C43 | 118.0(6)   | O12 | C61 | C60 | 109.9(5) |
| C43 | N3  | Cu3 | 114.5(4)   | C63 | C62 | C60 | 111.2(5) |
| C58 | N4  | Cu4 | 126.1(5)   | C64 | C63 | C62 | 122.3(6) |
| C58 | N4  | C60 | 122.1(6)   | C64 | C63 | C68 | 117.8(6) |
| C60 | N4  | Cu4 | 111.8(4)   | C68 | C63 | C62 | 119.8(7) |
| O19 | N6  | O18 | 119.1(9)   | C65 | C64 | C63 | 121.6(7) |
| O20 | N6  | O18 | 126.4(10)  | C66 | C65 | C64 | 119.8(8) |
| O20 | N6  | O19 | 114.4(11)  | C65 | C66 | C67 | 120.9(7) |
| O2  | C1  | C2  | 118.3(6)   | C66 | C67 | C68 | 119.3(8) |
| O2  | C1  | C6  | 123.2(5)   | C67 | C68 | C63 | 120.6(8) |
| C6  | C1  | C2  | 118.4(5)   | O16 | N5  | O15 | 119.4(8) |
| O1  | C2  | C1  | 114.3(6)   | O17 | N5  | O15 | 116.9(8) |
| O1  | C2  | C3  | 125.2(6)   | O17 | N5  | O16 | 123.8(7) |

Table S4. Crystallographic data of complexes R-1: bond lengths

| Atom | Atom | Length/Å  | Atom | Atom | Length/Å  |
|------|------|-----------|------|------|-----------|
| Cu1  | O2   | 1.931(5)  | C16  | C17  | 1.381(11) |
| Cu1  | O3   | 2.004(5)  | C18  | C19  | 1.428(10) |
| Cu1  | O6   | 1.938(4)  | C18  | C23  | 1.393(10) |
| Cu1  | O13  | 2.302(5)  | C19  | C20  | 1.363(11) |
| Cu1  | N1   | 1.942(5)  | C20  | C21  | 1.387(13) |
| Cu2  | O5   | 1.911(5)  | C21  | C22  | 1.365(12) |
| Cu2  | O6   | 1.972(4)  | C22  | C23  | 1.416(10) |
| Cu2  | O7   | 2.387(5)  | C23  | C24  | 1.433(10) |
| Cu2  | O8   | 1.995(4)  | C26  | C27  | 1.523(9)  |
| Cu2  | N2   | 1.928(5)  | C26  | C28  | 1.519(10) |
| Cu3  | O8   | 1.933(5)  | C28  | C29  | 1.493(10) |
| Cu3  | O9   | 1.969(5)  | C29  | C30  | 1.378(11) |
| Cu3  | O12  | 1.948(4)  | C29  | C34  | 1.404(11) |
| Cu3  | O14  | 2.301(5)  | C30  | C31  | 1.373(11) |
| Cu3  | N3   | 1.944(6)  | C31  | C32  | 1.382(12) |
| Cu4  | O1   | 2.425(5)  | C32  | C33  | 1.385(12) |
| Cu4  | O2   | 1.984(4)  | C33  | C34  | 1.372(11) |
| Cu4  | O11  | 1.922(5)  | C35  | C36  | 1.408(10) |
| Cu4  | O12  | 1.981(5)  | C35  | C40  | 1.394(9)  |
| Cu4  | N4   | 1.940(6)  | C36  | C37  | 1.367(10) |
| O1   | C2   | 1.358(9)  | C37  | C38  | 1.394(12) |
| O1   | C8   | 1.423(9)  | C38  | C39  | 1.372(12) |
| O2   | C1   | 1.326(8)  | C39  | C40  | 1.417(10) |
| O3   | C10  | 1.428(9)  | C40  | C41  | 1.436(10) |
| O4   | C19  | 1.375(9)  | C43  | C44  | 1.515(12) |
| O4   | C25  | 1.418(9)  | C43  | C45  | 1.528(11) |
| O5   | C18  | 1.303(8)  | C45  | C46  | 1.506(12) |
| O6   | C27  | 1.427(8)  | C46  | C47  | 1.370(13) |
| O7   | C36  | 1.367(8)  | C46  | C51  | 1.383(12) |
| O7   | C42  | 1.421(9)  | C47  | C48  | 1.398(16) |
| O8   | C35  | 1.333(8)  | C48  | C49  | 1.373(18) |
| O9   | C44  | 1.447(9)  | C49  | C50  | 1.339(16) |
| O10  | C53  | 1.368(11) | C50  | C51  | 1.368(14) |
| O10  | C59  | 1.426(11) | C52  | C53  | 1.425(10) |
| O11  | C52  | 1.305(9)  | C52  | C57  | 1.396(11) |
| O12  | C61  | 1.421(8)  | C53  | C54  | 1.367(13) |
| O13  | C69A | 1.414(13) | C54  | C55  | 1.384(14) |
| O14  | C70  | 1.421(9)  | C55  | C56  | 1.382(13) |
| N1   | C7   | 1.292(9)  | C56  | C57  | 1.418(11) |
| N1   | C9   | 1.455(8)  | C57  | C58  | 1.442(11) |
| N2   | C24  | 1.297(9)  | C60  | C61  | 1.513(10) |
| N2   | C26  | 1.474(9)  | C60  | C62  | 1.512(10) |
| N3   | C41  | 1.296(10) | C62  | C63  | 1.495(11) |

|     |     |           |      |     |           |
|-----|-----|-----------|------|-----|-----------|
| N3  | C43 | 1.472(9)  | C63  | C64 | 1.393(12) |
| N4  | C58 | 1.278(9)  | C63  | C68 | 1.374(11) |
| N4  | C60 | 1.482(9)  | C64  | C65 | 1.380(13) |
| C1  | C2  | 1.411(10) | C65  | C66 | 1.381(14) |
| C1  | C6  | 1.406(10) | C66  | C67 | 1.359(14) |
| C2  | C3  | 1.382(11) | C67  | C68 | 1.385(12) |
| C3  | C4  | 1.377(12) | O18A | N6A | 1.162(13) |
| C4  | C5  | 1.367(11) | O18B | N6B | 1.249(18) |
| C5  | C6  | 1.423(10) | O19A | N6A | 1.251(15) |
| C6  | C7  | 1.439(10) | O19B | N6B | 1.245(19) |
| C9  | C10 | 1.533(10) | O20A | N6A | 1.234(14) |
| C9  | C11 | 1.527(9)  | O20B | N6B | 1.253(19) |
| C11 | C12 | 1.499(9)  | O71A | C71 | 1.43(2)   |
| C12 | C13 | 1.388(11) | O71B | C71 | 1.38(2)   |
| C12 | C17 | 1.389(10) | O15  | N5  | 1.259(9)  |
| C13 | C14 | 1.394(12) | O16  | N5  | 1.247(10) |
| C14 | C15 | 1.374(14) | O17  | N5  | 1.211(11) |
| C15 | C16 | 1.371(13) |      |     |           |

**Table S5. Crystallographic data of complexes R-1: bond angles**

| Atom | Atom | Atom | Angle/°   | Atom | Atom | Atom | Angle/°  |
|------|------|------|-----------|------|------|------|----------|
| O2   | Cu1  | O3   | 173.9(2)  | C13  | C12  | C11  | 121.5(6) |
| O2   | Cu1  | O6   | 86.78(19) | C13  | C12  | C17  | 117.7(7) |
| O2   | Cu1  | O13  | 89.1(2)   | C17  | C12  | C11  | 120.8(6) |
| O2   | Cu1  | N1   | 91.9(2)   | C12  | C13  | C14  | 121.2(8) |
| O3   | Cu1  | O13  | 94.5(2)   | C15  | C14  | C13  | 119.3(8) |
| O6   | Cu1  | O3   | 97.8(2)   | C16  | C15  | C14  | 120.6(8) |
| O6   | Cu1  | O13  | 95.01(19) | C15  | C16  | C17  | 119.7(8) |
| O6   | Cu1  | N1   | 164.6(2)  | C16  | C17  | C12  | 121.5(7) |
| N1   | Cu1  | O3   | 82.6(2)   | O5   | C18  | C19  | 117.7(6) |
| N1   | Cu1  | O13  | 100.3(2)  | O5   | C18  | C23  | 125.3(6) |
| O5   | Cu2  | O6   | 174.4(2)  | C23  | C18  | C19  | 117.0(6) |
| O5   | Cu2  | O7   | 95.52(19) | O4   | C19  | C18  | 113.1(6) |
| O5   | Cu2  | O8   | 90.64(19) | C20  | C19  | O4   | 125.1(7) |
| O5   | Cu2  | N2   | 93.7(2)   | C20  | C19  | C18  | 121.8(7) |
| O6   | Cu2  | O7   | 90.09(18) | C19  | C20  | C21  | 120.2(7) |
| O6   | Cu2  | O8   | 91.28(18) | C22  | C21  | C20  | 120.2(8) |
| O8   | Cu2  | O7   | 73.20(18) | C21  | C22  | C23  | 120.4(8) |
| N2   | Cu2  | O6   | 85.0(2)   | C18  | C23  | C22  | 120.4(7) |
| N2   | Cu2  | O7   | 99.8(2)   | C18  | C23  | C24  | 123.0(6) |
| N2   | Cu2  | O8   | 172.1(2)  | C22  | C23  | C24  | 116.5(7) |
| O8   | Cu3  | O9   | 171.8(2)  | N2   | C24  | C23  | 125.7(6) |
| O8   | Cu3  | O12  | 86.71(19) | N2   | C26  | C27  | 105.5(5) |

|      |     |     |           |     |     |     |           |
|------|-----|-----|-----------|-----|-----|-----|-----------|
| O8   | Cu3 | O14 | 92.96(19) | N2  | C26 | C28 | 116.0(6)  |
| O8   | Cu3 | N3  | 91.5(2)   | C28 | C26 | C27 | 111.8(6)  |
| O9   | Cu3 | O14 | 92.9(2)   | O6  | C27 | C26 | 108.5(5)  |
| O12  | Cu3 | O9  | 98.5(2)   | C29 | C28 | C26 | 110.0(6)  |
| O12  | Cu3 | O14 | 94.88(18) | C30 | C29 | C28 | 121.6(7)  |
| N3   | Cu3 | O9  | 82.1(2)   | C30 | C29 | C34 | 117.4(7)  |
| N3   | Cu3 | O12 | 168.9(2)  | C34 | C29 | C28 | 120.8(7)  |
| N3   | Cu3 | O14 | 96.2(2)   | C31 | C30 | C29 | 122.1(8)  |
| O2   | Cu4 | O1  | 71.72(18) | C30 | C31 | C32 | 120.2(8)  |
| O11  | Cu4 | O1  | 94.9(2)   | C31 | C32 | C33 | 118.8(8)  |
| O11  | Cu4 | O2  | 91.7(2)   | C34 | C33 | C32 | 120.8(8)  |
| O11  | Cu4 | O12 | 174.1(2)  | C33 | C34 | C29 | 120.7(8)  |
| O11  | Cu4 | N4  | 92.8(2)   | O8  | C35 | C36 | 119.4(6)  |
| O12  | Cu4 | O1  | 90.97(19) | O8  | C35 | C40 | 121.9(6)  |
| O12  | Cu4 | O2  | 90.80(19) | C40 | C35 | C36 | 118.7(6)  |
| N4   | Cu4 | O1  | 101.9(2)  | O7  | C36 | C35 | 114.6(6)  |
| N4   | Cu4 | O2  | 172.5(2)  | O7  | C36 | C37 | 123.9(7)  |
| N4   | Cu4 | O12 | 85.3(2)   | C37 | C36 | C35 | 121.6(7)  |
| C2   | O1  | Cu4 | 109.4(4)  | C36 | C37 | C38 | 119.6(7)  |
| C2   | O1  | C8  | 118.6(6)  | C39 | C38 | C37 | 120.3(7)  |
| C8   | O1  | Cu4 | 131.2(5)  | C38 | C39 | C40 | 120.5(7)  |
| Cu1  | O2  | Cu4 | 106.8(2)  | C35 | C40 | C39 | 119.1(7)  |
| C1   | O2  | Cu1 | 128.9(4)  | C35 | C40 | C41 | 124.2(6)  |
| C1   | O2  | Cu4 | 124.0(4)  | C39 | C40 | C41 | 116.6(6)  |
| C10  | O3  | Cu1 | 112.8(4)  | N3  | C41 | C40 | 125.7(6)  |
| C19  | O4  | C25 | 117.5(6)  | N3  | C43 | C44 | 106.7(6)  |
| C18  | O5  | Cu2 | 126.2(4)  | N3  | C43 | C45 | 109.3(6)  |
| Cu1  | O6  | Cu2 | 123.8(2)  | C44 | C43 | C45 | 112.8(7)  |
| C27  | O6  | Cu1 | 117.8(4)  | O9  | C44 | C43 | 107.8(6)  |
| C27  | O6  | Cu2 | 107.2(4)  | C46 | C45 | C43 | 114.3(7)  |
| C36  | O7  | Cu2 | 110.2(4)  | C47 | C46 | C45 | 121.1(9)  |
| C36  | O7  | C42 | 119.1(6)  | C47 | C46 | C51 | 118.2(9)  |
| C42  | O7  | Cu2 | 130.8(5)  | C51 | C46 | C45 | 120.7(8)  |
| Cu3  | O8  | Cu2 | 107.3(2)  | C46 | C47 | C48 | 119.8(11) |
| C35  | O8  | Cu2 | 122.6(4)  | C49 | C48 | C47 | 120.6(10) |
| C35  | O8  | Cu3 | 129.5(4)  | C50 | C49 | C48 | 119.1(11) |
| C44  | O9  | Cu3 | 114.1(5)  | C49 | C50 | C51 | 121.3(11) |
| C53  | O10 | C59 | 117.2(8)  | C50 | C51 | C46 | 121.0(9)  |
| C52  | O11 | Cu4 | 126.3(5)  | O11 | C52 | C53 | 118.8(7)  |
| Cu3  | O12 | Cu4 | 127.5(2)  | O11 | C52 | C57 | 124.7(6)  |
| C61  | O12 | Cu3 | 118.0(4)  | C57 | C52 | C53 | 116.6(7)  |
| C61  | O12 | Cu4 | 106.8(4)  | O10 | C53 | C52 | 113.8(7)  |
| C69A | O13 | Cu1 | 139.0(8)  | C54 | C53 | O10 | 124.0(7)  |
| C70  | O14 | Cu3 | 133.5(5)  | C54 | C53 | C52 | 122.1(8)  |
| C7   | N1  | Cu1 | 125.9(5)  | C53 | C54 | C55 | 120.9(8)  |

|     |     |     |          |      |     |      |           |
|-----|-----|-----|----------|------|-----|------|-----------|
| C7  | N1  | C9  | 119.7(5) | C56  | C55 | C54  | 118.9(8)  |
| C9  | N1  | Cu1 | 114.4(4) | C55  | C56 | C57  | 120.8(9)  |
| C24 | N2  | Cu2 | 124.9(5) | C52  | C57 | C56  | 120.6(7)  |
| C24 | N2  | C26 | 122.8(6) | C52  | C57 | C58  | 123.2(6)  |
| C26 | N2  | Cu2 | 112.3(4) | C56  | C57 | C58  | 116.2(7)  |
| C41 | N3  | Cu3 | 126.5(5) | N4   | C58 | C57  | 125.5(7)  |
| C41 | N3  | C43 | 118.9(6) | N4   | C60 | C61  | 105.3(6)  |
| C43 | N3  | Cu3 | 114.6(5) | N4   | C60 | C62  | 116.1(6)  |
| C58 | N4  | Cu4 | 125.3(5) | C62  | C60 | C61  | 113.2(6)  |
| C58 | N4  | C60 | 122.9(6) | O12  | C61 | C60  | 110.3(6)  |
| C60 | N4  | Cu4 | 111.7(4) | C63  | C62 | C60  | 111.1(6)  |
| O2  | C1  | C2  | 118.6(6) | C64  | C63 | C62  | 119.8(7)  |
| O2  | C1  | C6  | 122.9(6) | C68  | C63 | C62  | 121.6(8)  |
| C6  | C1  | C2  | 118.5(6) | C68  | C63 | C64  | 118.5(8)  |
| O1  | C2  | C1  | 114.3(6) | C65  | C64 | C63  | 120.3(9)  |
| O1  | C2  | C3  | 125.4(7) | C64  | C65 | C66  | 119.6(9)  |
| C3  | C2  | C1  | 120.3(7) | C67  | C66 | C65  | 120.8(8)  |
| C4  | C3  | C2  | 120.7(7) | C66  | C67 | C68  | 119.4(9)  |
| C5  | C4  | C3  | 121.0(7) | C63  | C68 | C67  | 121.3(9)  |
| C4  | C5  | C6  | 119.6(7) | O18A | N6A | O19A | 121.0(14) |
| C1  | C6  | C5  | 119.9(6) | O18A | N6A | O20A | 127.8(14) |
| C1  | C6  | C7  | 122.6(6) | O20A | N6A | O19A | 109.8(12) |
| C5  | C6  | C7  | 117.2(6) | O18B | N6B | O20B | 125.8(18) |
| N1  | C7  | C6  | 126.7(6) | O19B | N6B | O18B | 116.3(16) |
| N1  | C9  | C10 | 106.7(5) | O19B | N6B | O20B | 117.9(17) |
| N1  | C9  | C11 | 109.4(5) | O16  | N5  | O15  | 119.3(8)  |
| C11 | C9  | C10 | 111.9(6) | O17  | N5  | O15  | 117.8(9)  |
| O3  | C10 | C9  | 109.7(6) | O17  | N5  | O16  | 122.8(7)  |
| C12 | C11 | C9  | 112.3(6) |      |     |      |           |

## Powder X-ray diffraction (PXRD) pattern

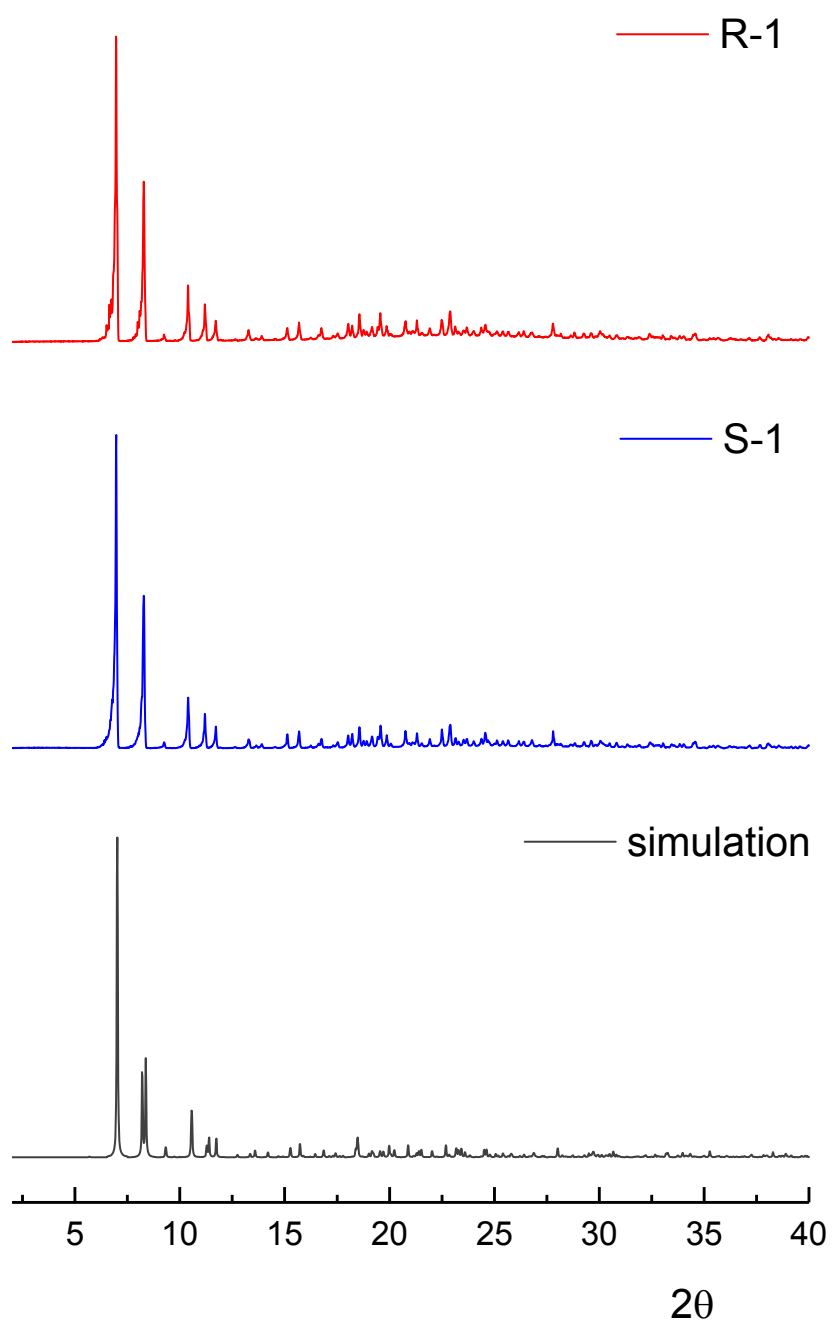

**Figure S1** Comparison of PXRD pattern of S-1 and R-1 to simulation pattern.



# NMR and IR spectra

MM-KP35 1H.10.1.1r  
 PROTON DMSO {C:\Bruker\TOPSPIN} Merkel 49

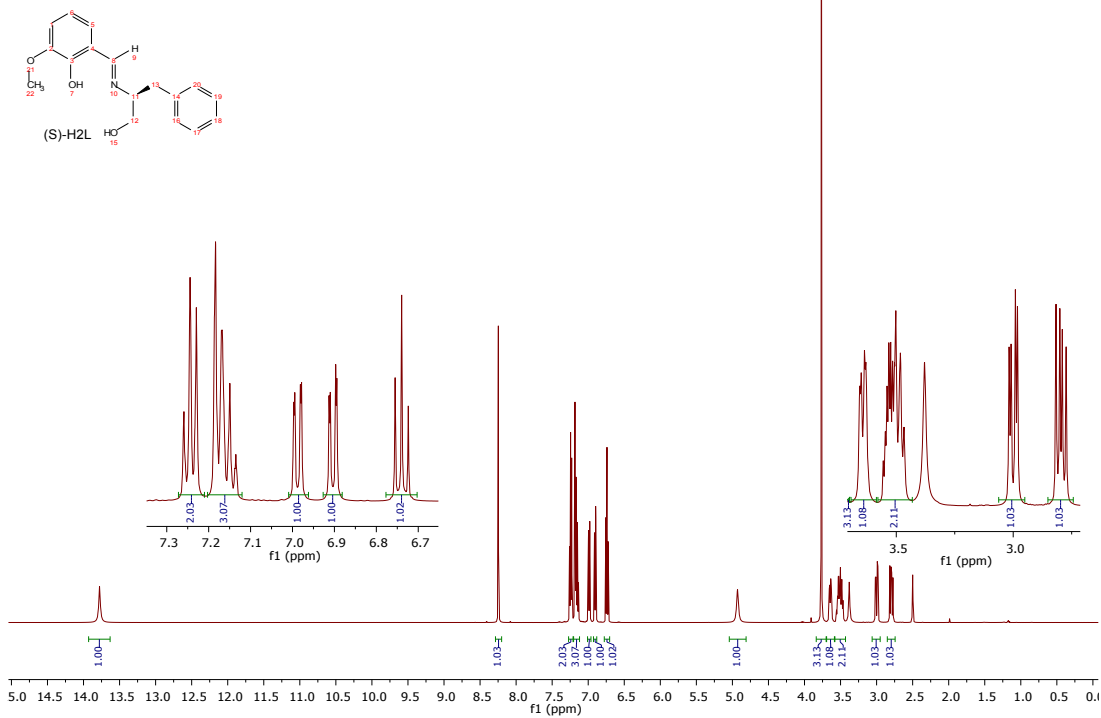

MM-KP35 13C.11.1.1r  
 C13CPD DMSO {C:\Bruker\TOPSPIN} Merkel 49

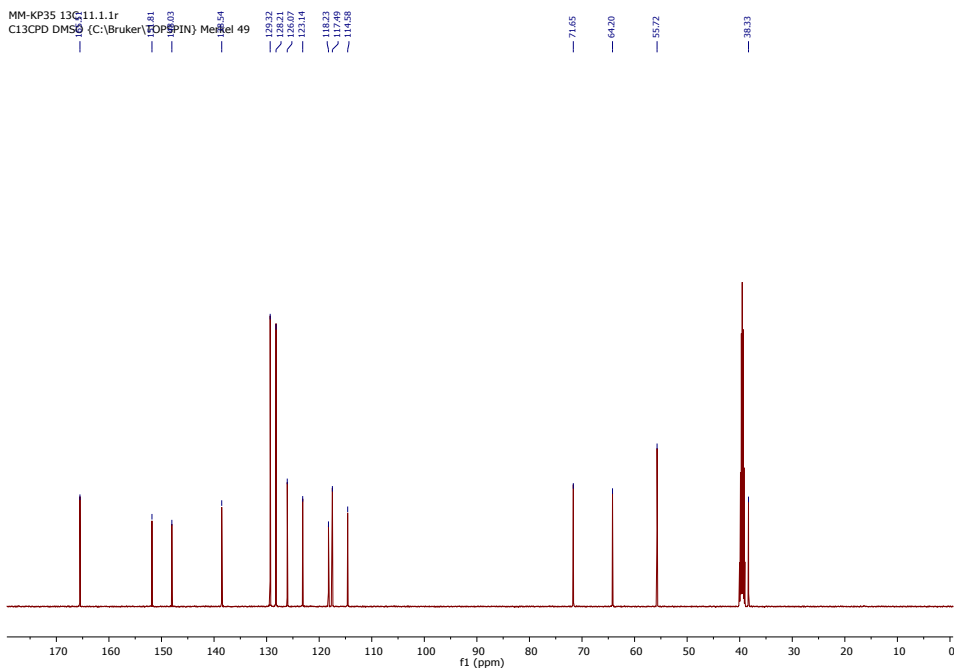

Figure S2. <sup>1</sup>H and <sup>13</sup>C NMR of chiral Schiff-base (S)-H<sub>2</sub>L.

MM-KP44 1H.10.1.1r  
PROTON DMSO {C:\Bruker\TOPSPIN} Merck 26

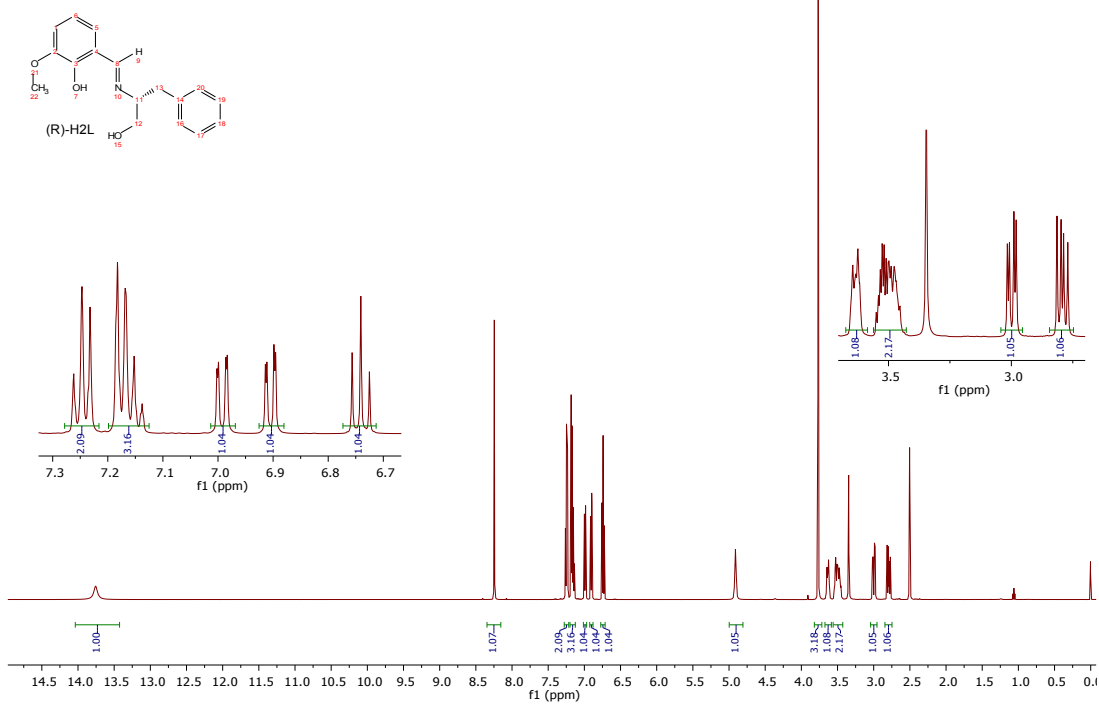

MM-KP44 13C.11.1.1r  
C13CPD DMSO {C:\Bruker\TOPSPIN} Merck 26

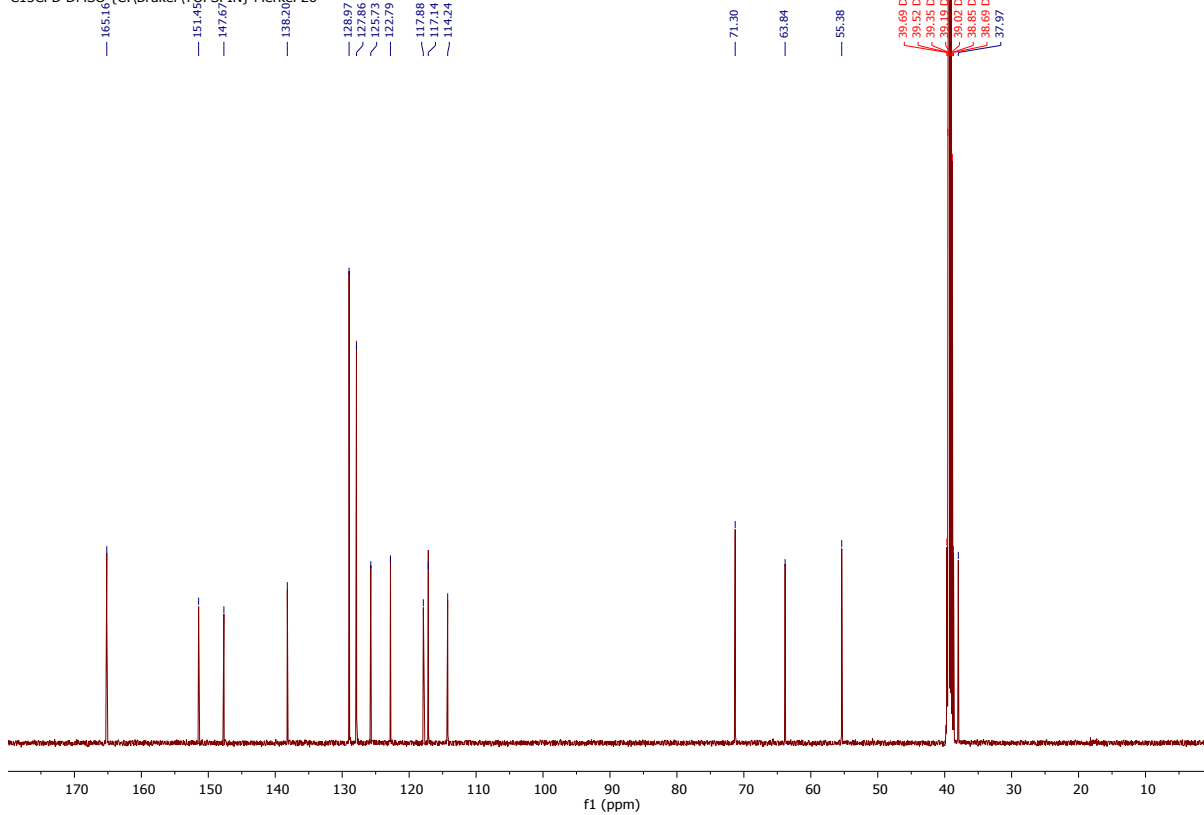

Figure S3. <sup>1</sup>H and <sup>13</sup>C NMR of chiral Schiff-base (R)-H<sub>2</sub>L.

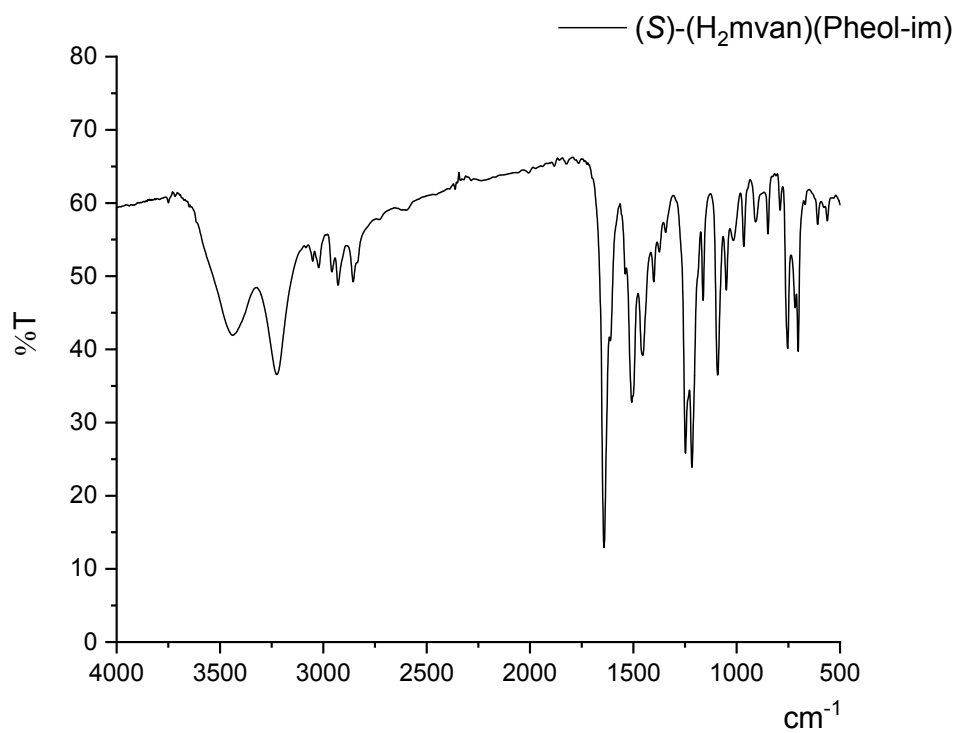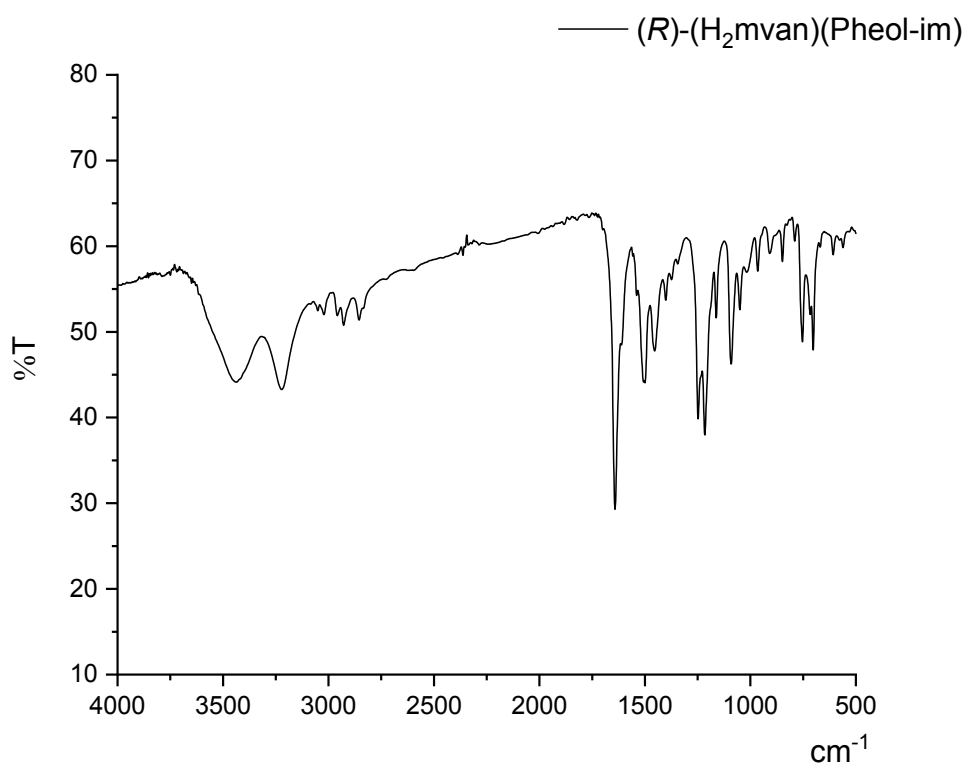

**Figure S4.** IR spectra of chiral Schiff-base (S)-H<sub>2</sub>L and (R)-H<sub>2</sub>L in KBr pallet.

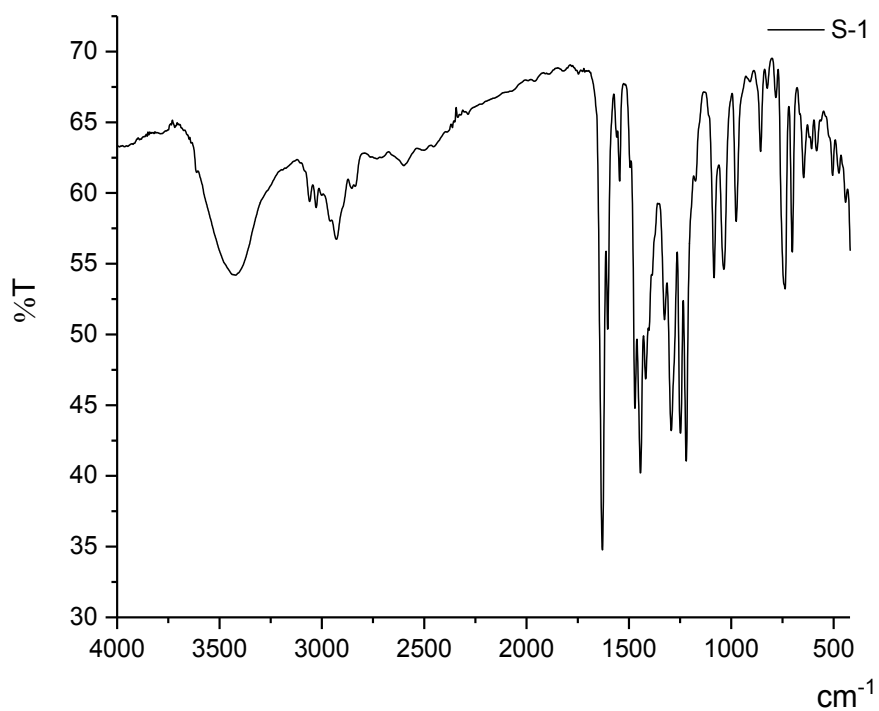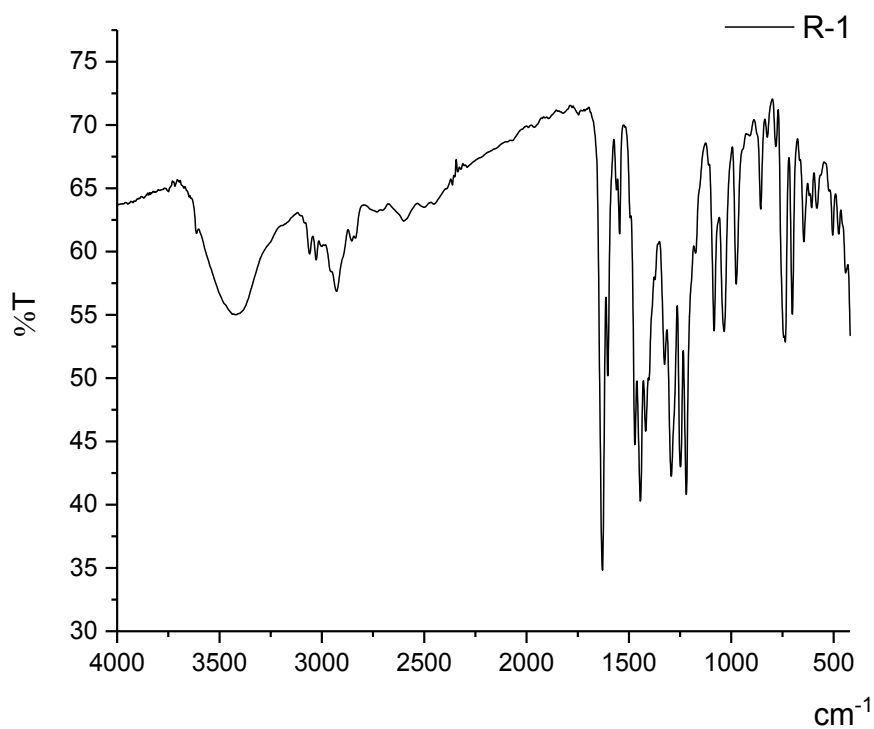

Figure S5. IR spectra of S-1 and R-1 in KBr pallet.

## UV-Vis of Complex S-1 and R-1 comparison to S-H<sub>2</sub>L

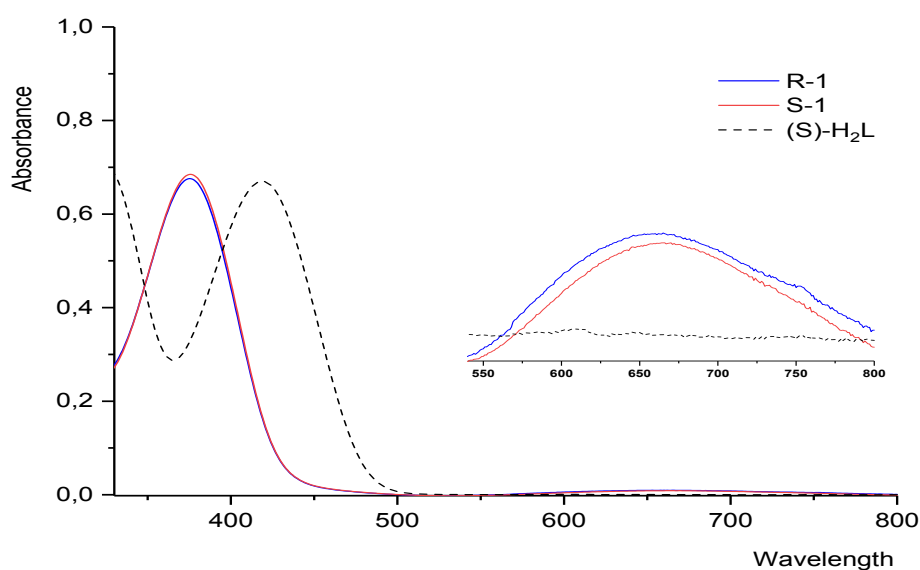

Figure S6. Absorption spectra of **S-1** and **R-1** compare to (S)-H<sub>2</sub>L ligand.

## Antibacterial studies

The antibacterial activity of **S-1** and **R-1** was evaluated in batch cultures. Gram-positive *B. subtilis* as well as Gram-negative *E. coli* were chosen as model systems for this investigation. After direct addition of the complexes dissolved in DMSO to the bacterial media, growth was monitored over time in comparison to vehicle control cultures. These analyses showed that both enantiomers possess comparable growth inhibitory effects towards the Gram-positive strain, but have no bactericidal activity against its Gram-negative counterpart. Incubation of *B. subtilis* in the presence of 50 or 100  $\mu\text{M}$  of either **S-1** or **R-1** prevents their growth entirely, whereas addition of 10  $\mu\text{M}$  of both substances only led to growth delay.

a)

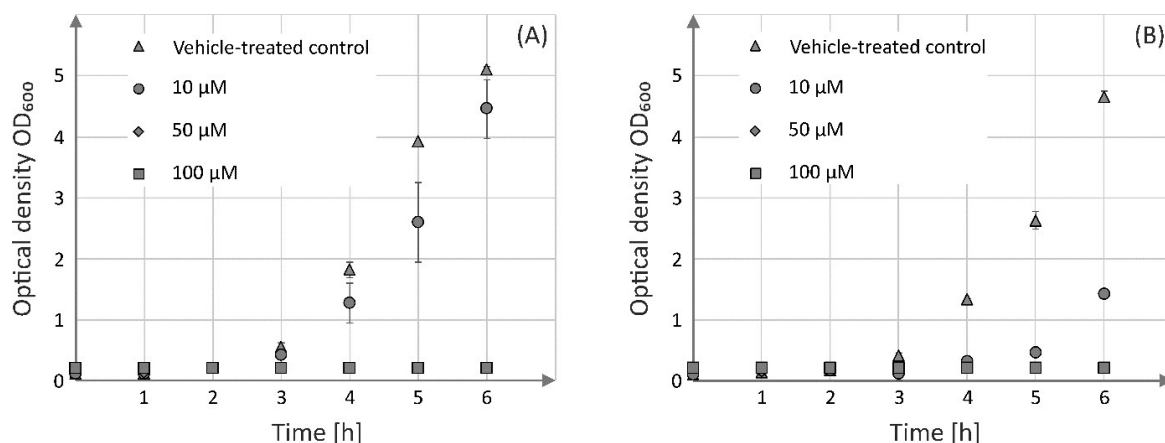

b)

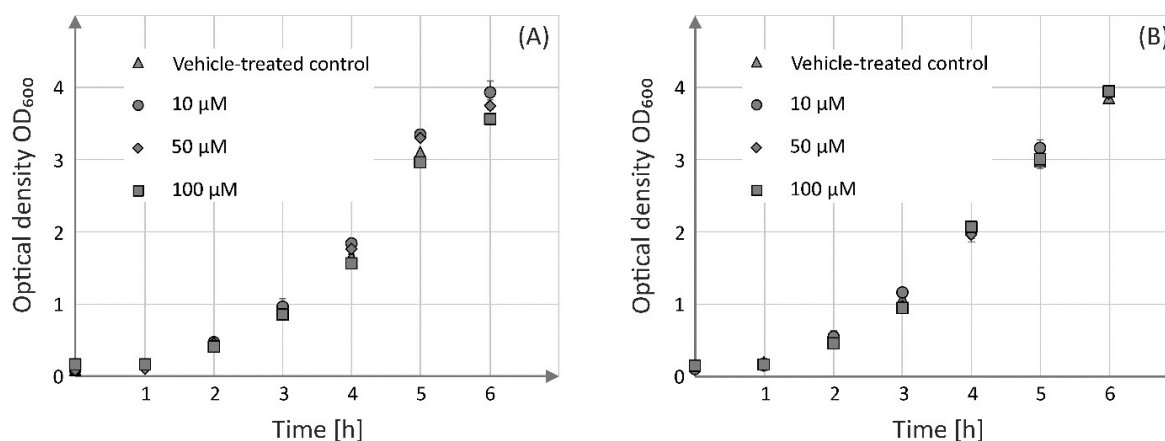

**Figure S7.** Cell densities measured at a wavelength of 600 nm (OD<sub>600</sub>) during cultivation of Gram-positive *B. subtilis* (a) and Gram-negative *E. coli* (b) in the presence of 10 μM (circle), 50 μM (rhombus) or 100 μM (square) of **S-1** (A) and **R-1** (B), respectively.

### Stability test of Cu(II)-cluster C<sub>70</sub>H<sub>78</sub>Cu<sub>4</sub>N<sub>6</sub>O<sub>20</sub> (**S-1**) and (**R-1**)

The stability of these complexes were investigated by the following of the change of molecular mass over 48h at 37 °C in the presence of 0.4% DMSO in water. The mass spectroscopy analysis reveals the molecular mass of **S-1** and **R-1** at 1735 m/z (plus water molecule and DMSO) and the fragment of two methanol ligand at 1389 m/z. These analysis evidence that both Cu(II)-complexes are stable over 48h in the presence of water (Figure S8)

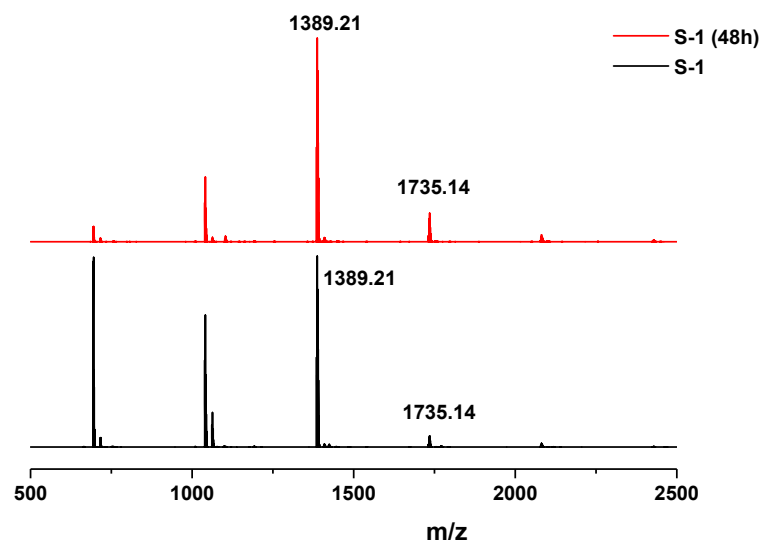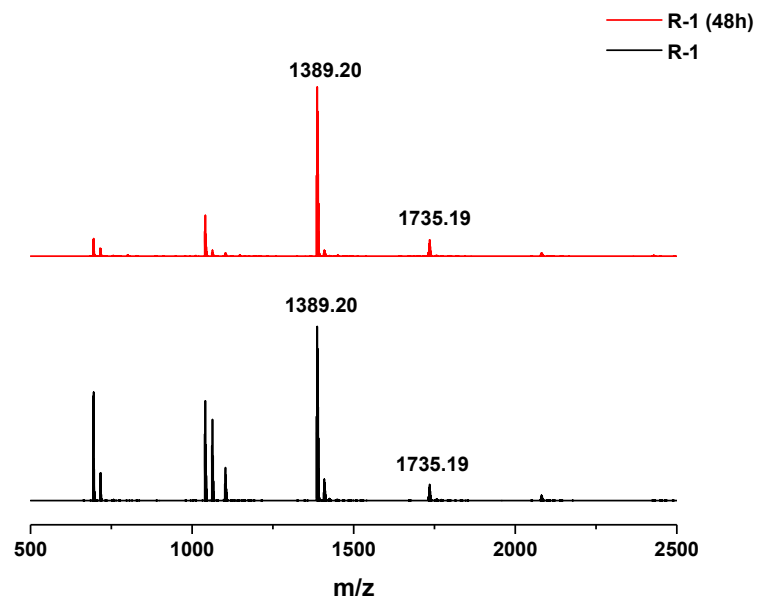

Figure S8. ESI analysis of S-1 and R-1 in 0.4% DMSO in H<sub>2</sub>O at 37 °C for 48h.
